# Supplementary material
Source: PubMed Central journal article supplement (PMC3434524)
Supplement: MCB.00430-12_zmb999109581so2.pdf [file MCB.00430-12_zmb999109581so2.pdf]

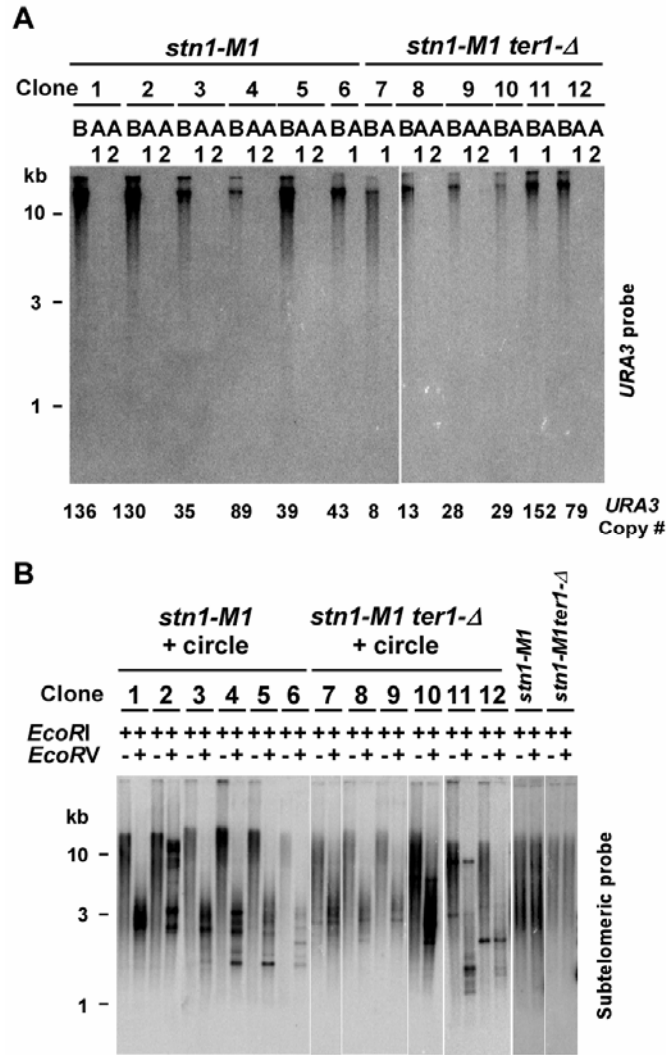

**FIG. S1. Even high copy numbers of *URA3* genes in *stn1-M1* and *stn1-M1 ter1-Δ* circle N transformants could be rapidly lost.** (A) Southern blot, hybridized with the *URA3* probe, of uncut DNA from multiple *stn1-M1* and *stn1-M1 ter1-Δ* strains transformed with circle N before (indicated by a B above lanes) and after they were patched on 5-FOA plates (two clones from each, indicated by A1 and A2 above lanes). Quantitation of *URA3* copy number for each clone before plating on 5-FOA was estimated by using the same method as used in Fig. 4B and shown below the lanes. (B) Southern blot, hybridized with a subtelomeric probe, of *EcoRI* or *EcoRI* + *EcoRV* digested DNA from the precursor (B) strains in panel A before they were patched on 5-

FOA. Untransformed *stn1-M1* and *stn1-M1 ter1-Δ* control strains are also shown. The extent to which bands are cleaved by *EcoRV* provides an indication of the percentage of telomeres containing *URA3* copies prior to plating on 5-FOA.
